# Supplementary material for: Environmentally exploitable biocide/fluorescent metal marker carbon quantum dots
Source: Royal Society of Chemistry journal article supplement (doi:10.1039/d0ra06383e), 2020-01-01
Supplement: d0ra06383e1.pdf [file d0ra06383e1.pdf]

### Supplementary data

**Figure S1:** The reproducibility results for the prepared CQDs (12 h, after dialysis); [a] size distribution and [b] Fluorescence spectra.

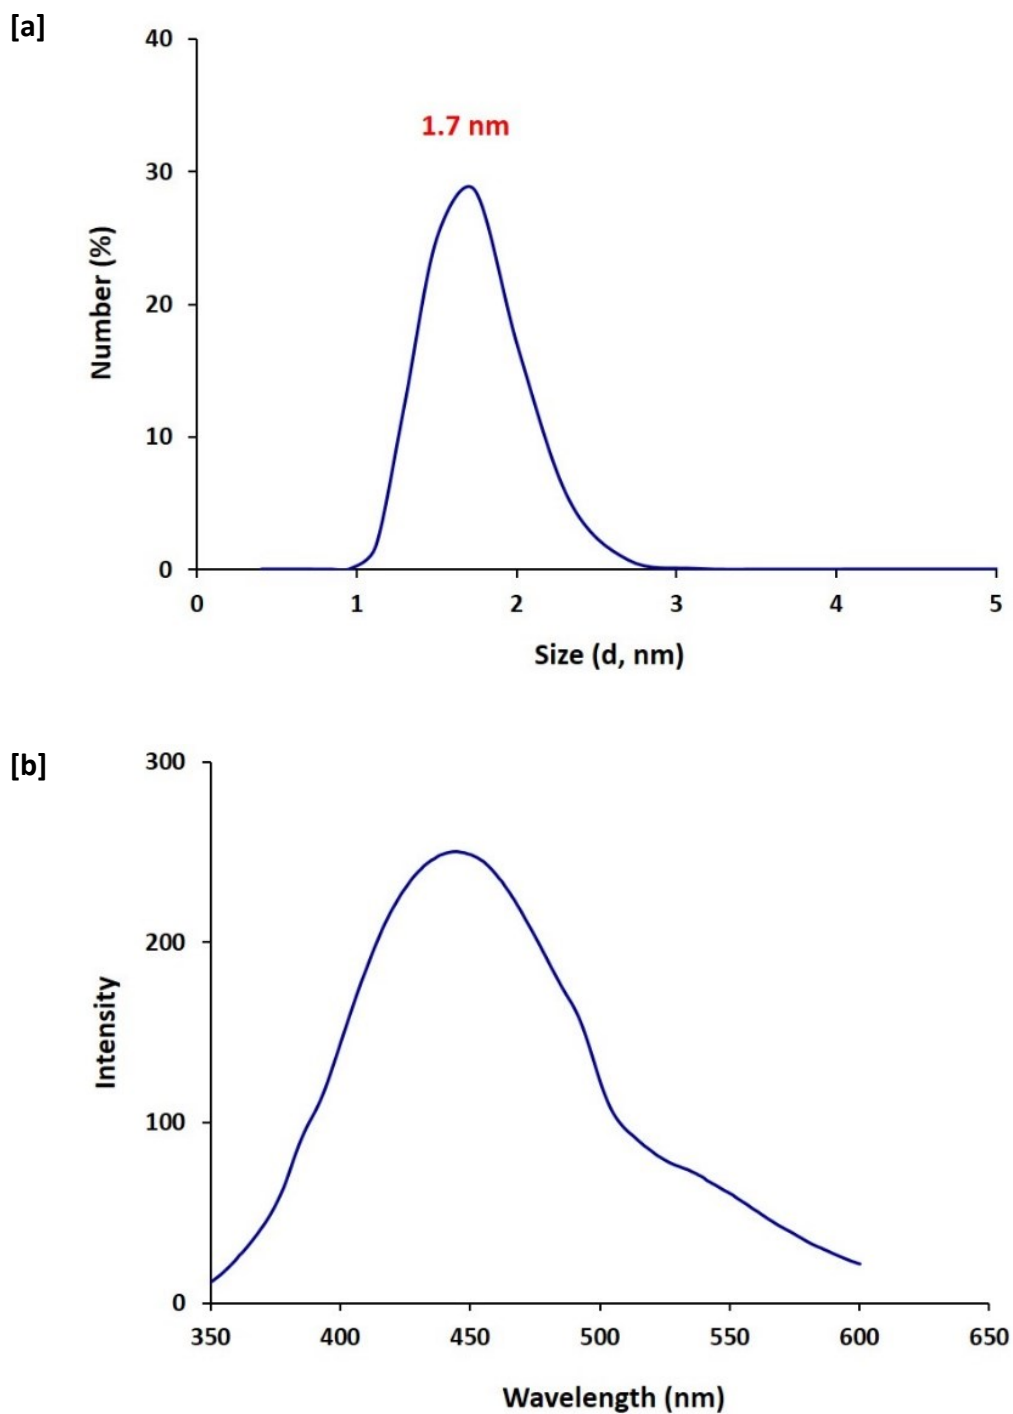

**Figure S2:** Stern–Volmer model for the fluorescence quenching of CQDs by metal ions ( $\text{Zn}^{+2}$  &  $\text{Hg}^{+2}$ ), the inset figures presented the only linear relationship.

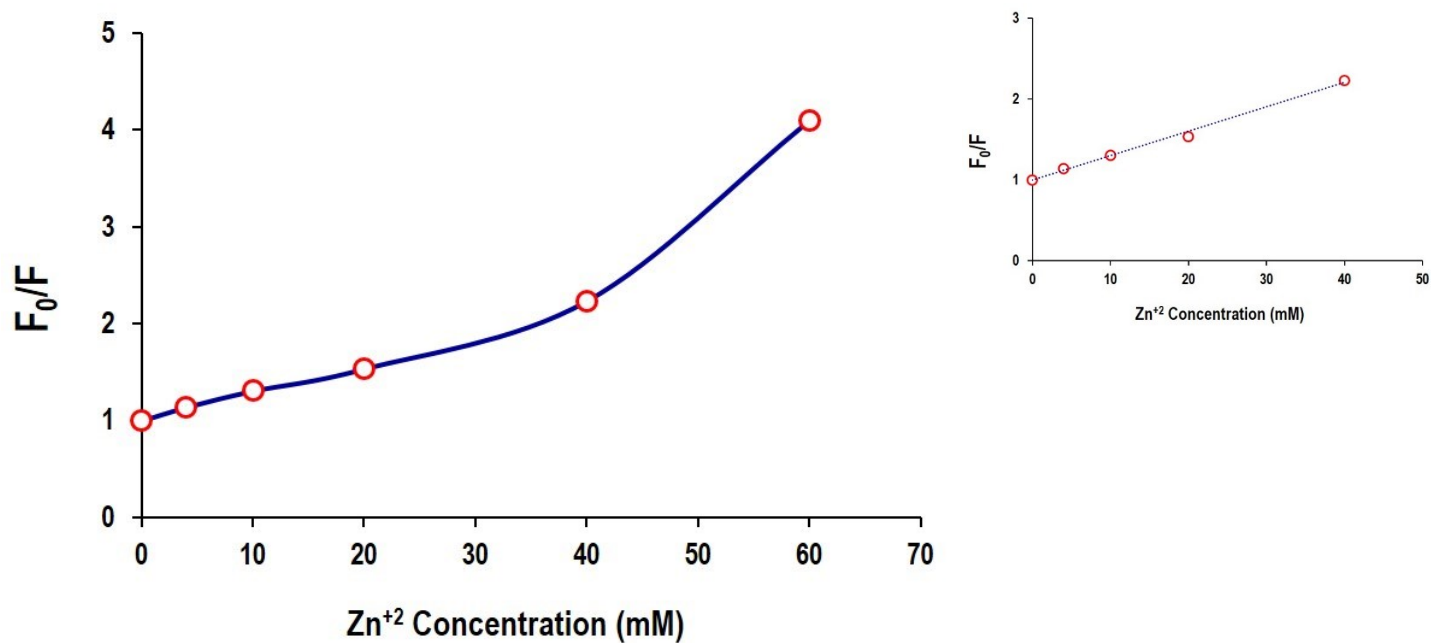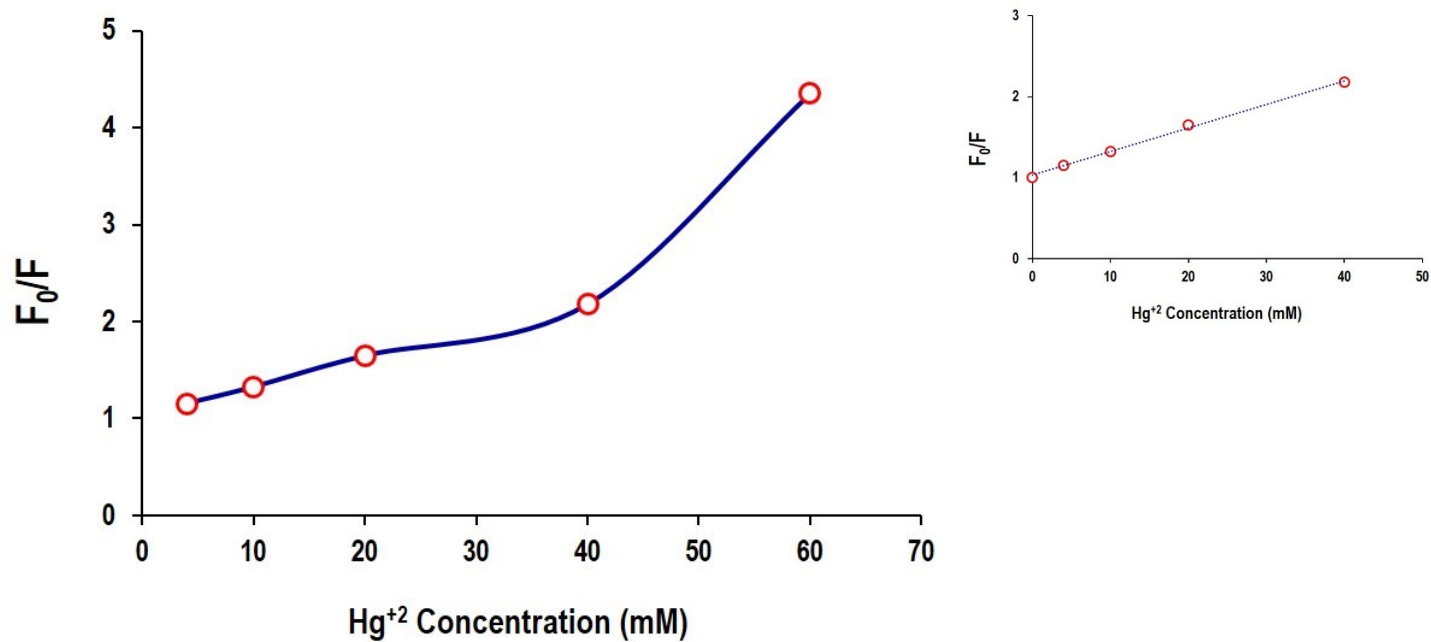

**Figure S3:** Photographic images for antimicrobial

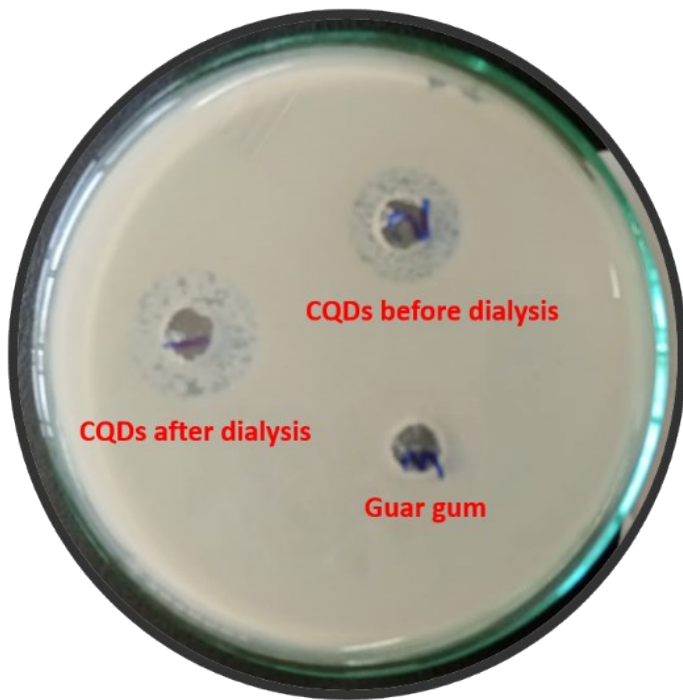

**B. Cereus**

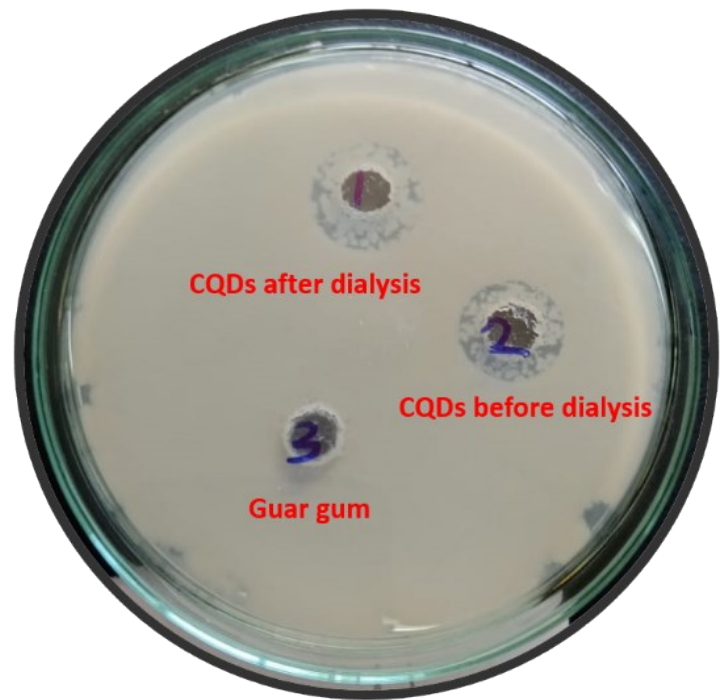

**C. Albicans**
